# Supplementary material for: Docking studies and molecular dynamics simulations of the binding characteristics of waldiomycin and its methyl ester analog to Staphylococcus aureus histidine kinase
Source: PubMed Central journal article supplement (PMC7274439; doi:10.1371/journal.pone.0234215), 2020-06-05

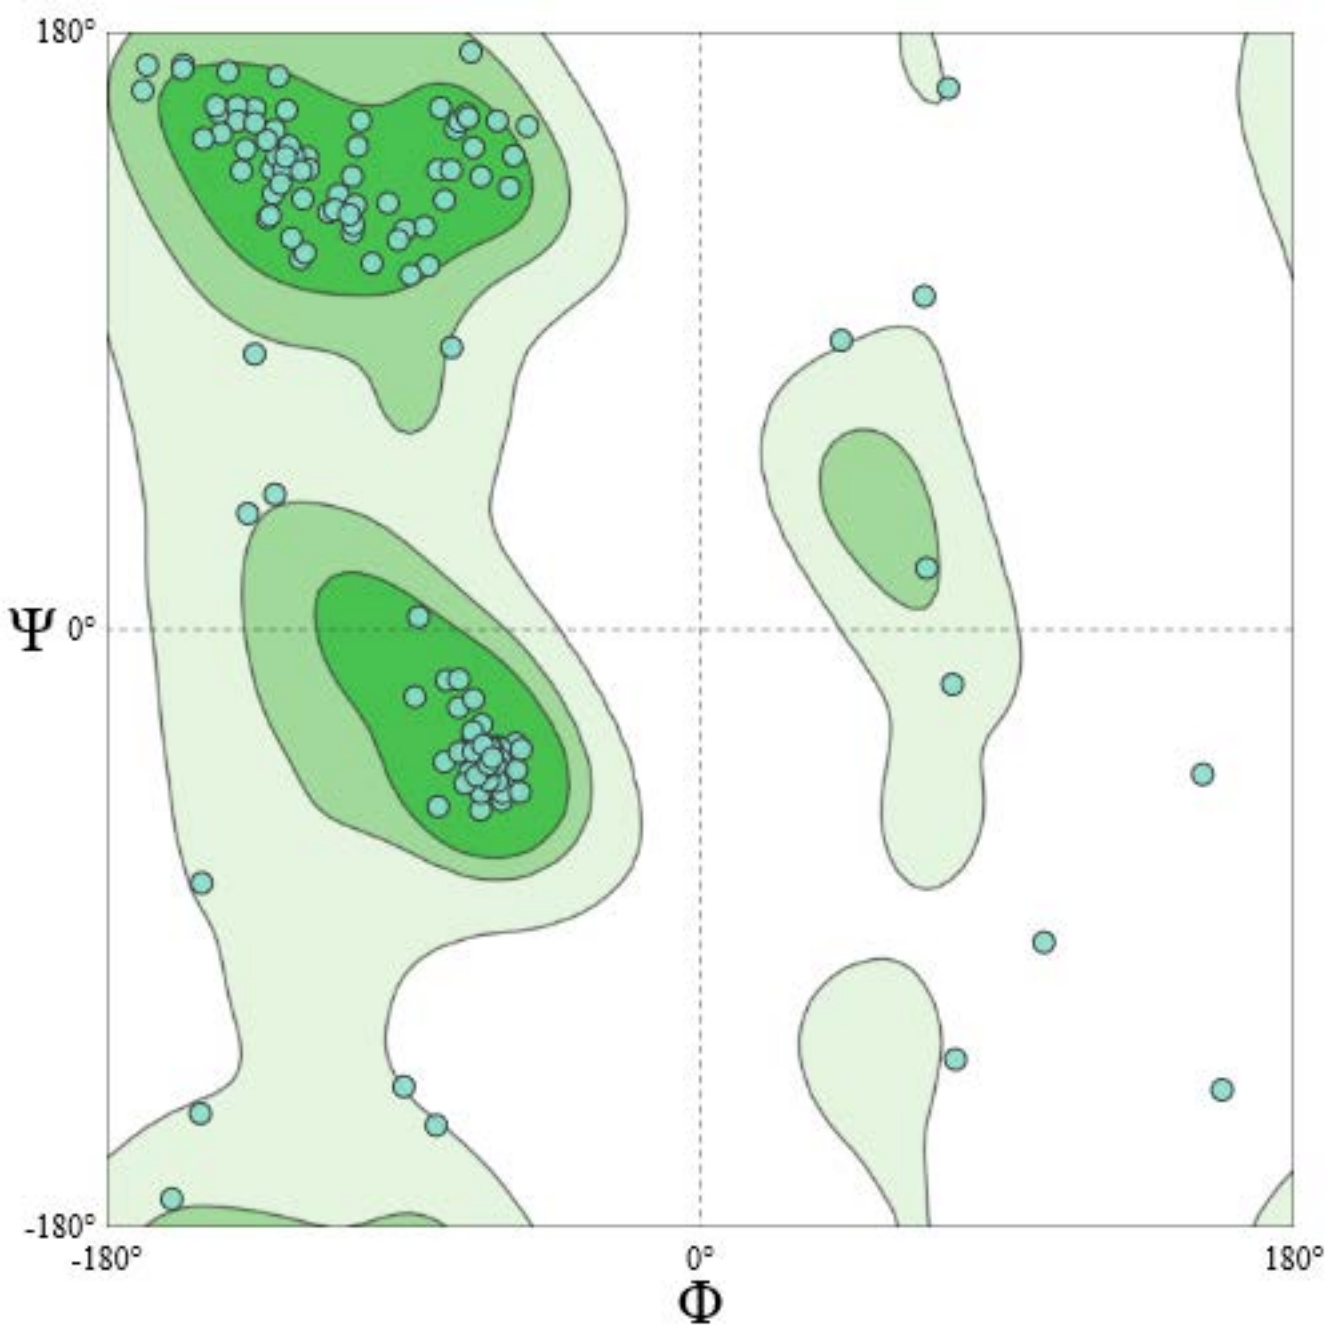

Supplement: pone.0234215.s002.pdf [file pone.0234215.s002.pdf]
